# Supplementary material for: Structure-directed formation of the dative/covalent bonds in complexes with C70⋯piperidine
Source: Royal Society of Chemistry journal article supplement (doi:10.1039/d0cp06280d), 2021-01-01
Supplement: d0cp06280d1.pdf [file d0cp06280d1.pdf]

## Structure-directed formation of the dative/covalent bonds in complexes with C<sub>70</sub>...piperidine

Rabindranath Lo,<sup>‡§+</sup> Maximilián Lamanec,<sup>‡¶+</sup> Weizhou Wang<sup>†</sup> Debashree Manna,<sup>‡§</sup> Aristides Bakandritsos,<sup>§°</sup> Martin Dračínský,<sup>‡</sup> Radek Zbořil,<sup>‡§°#</sup> Dana Nachtigallová,<sup>\*‡§</sup> and Pavel Hobza<sup>\*‡§</sup>

<sup>‡</sup>Institute of Organic Chemistry and Biochemistry, Czech Academy of Sciences, Flemingovo Náměstí 542/2, 16000 Prague, Czech Republic

<sup>¶</sup>Department of Physical Chemistry, Palacký University Olomouc, tr. 17 listopadu 12, 771 46 Olomouc, Czech Republic

<sup>§</sup>CATRIN, Palacký University, Šlechtitelů 27, 78371 Olomouc, Czech Republic

<sup>†</sup>College of Chemistry and Chemical Engineering, and Henan Key Laboratory of Function-Oriented Porous Materials, Luoyang Normal University, Luoyang 471934, China

<sup>°</sup>Regional Centre of Advanced Technologies and Materials, Palacký University, Olomouc, Šlechtitelů 27, 78371 Czech Republic.

<sup>#</sup>Nanotechnology Centre, VŠB–Technical University of Ostrava, 17. listopadu 2172/15, 708 00 Ostrava-Poruba, Czech Republic

<sup>+</sup>Both authors contributed equally and can be considered as a first author.

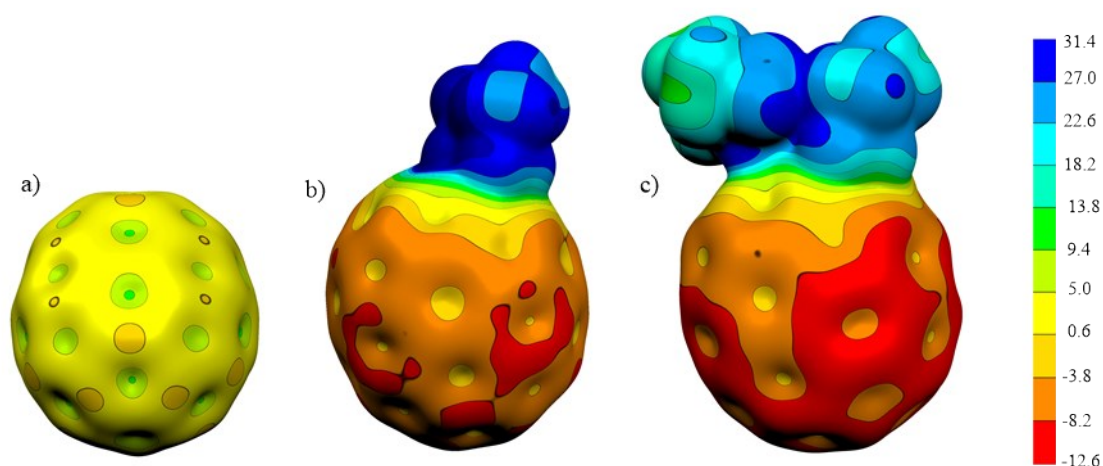

**Fig. S1** ESP of  $C_{70}$ ,  $C_{70}\dots\text{pip}$ , and  $C_{70}\dots(\text{pip})_2$ . Scale is in kcal/mol.

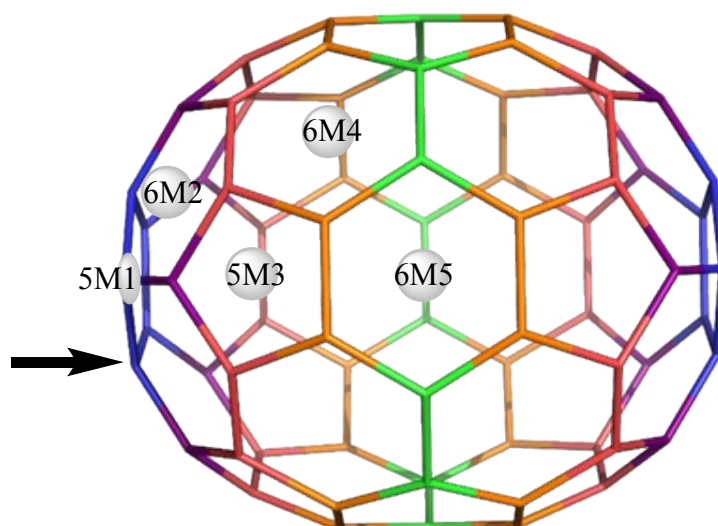

**Fig. S2** Structure of the  $C_{70}$  fullerene, together with the labels given to each ring. The arrow indicate the carbon site where pip is attached in DB complex.

**Table S1** Calculated interaction energy ( $\Delta E$ , kcal/mol) and decomposition into reference and correlation energies from DLPNO-CCSD(T) method.

|                         | $\Delta E$ | $\Delta E_{\text{geo-prep}}$ | $E_{\text{exch-rep}}$ | $E_{\text{elstat}} +$<br>$\Delta E_{\text{no-disp}}$ | $E_{\text{disp}}$ | $\Delta E_{\text{int}}^{C-(T)}$ | $E_{CT}^{\text{Corr}}$ |
|-------------------------|------------|------------------------------|-----------------------|------------------------------------------------------|-------------------|---------------------------------|------------------------|
| $C_{70}\dots\text{pip}$ | -6.3       | 13.9                         | 746.0                 | -747.7                                               | -17.4             | -1.1                            | -58.0                  |

**Table S2** The calculated NICS(0)<sub>zz</sub> values in ppm at different ring centroids.

|                                       | 5M1   | 6M2   | 5M3  | 6M4  | 6M5   |
|---------------------------------------|-------|-------|------|------|-------|
| C <sub>70</sub>                       | -14.3 | -16.1 | -8.3 | -2.9 | -15.6 |
| C <sub>70</sub> ···pip                | -16.8 | -14.7 | 1.8  | 2.7  | -14.2 |
| C <sub>70</sub> ···(pip) <sub>2</sub> | -14.9 | -13.8 | 1.6  | 2.8  | -13.7 |

**Table S3.** The N-H bending and C-N stretching vibrational frequencies (cm<sup>-1</sup>) of C<sub>70</sub>-(pip)<sub>2</sub> complex calculated at the PBE0-D3/def2-TZVPP IR intensities (in parentheses) are given in km/mol.

a) N-H bending vibrational frequencies

| Site | Inner (H-bond donor) | Outer           |
|------|----------------------|-----------------|
| A    | 1565.0 [23.719]      | 967.0 [77.1]    |
|      | 1619.6 [12.070]      | 1539.1 [22.917] |
| B    | 1567.7 [30.458]      | 965.8 [114.491] |
|      | 1623.9 [7.919]       | 1543.2 [15.785] |
| C    | 1534.8 [46.283]      | 982.4 [99.891]  |
|      | 1613.4 [15.821]      | 1490.4 [1.311]  |

b) C-N dative bond stretching vibrational frequencies

| Site | Inner           |
|------|-----------------|
| A    | 880.0 [395.309] |
|      | 938.6 [72.904]  |
| B    | 863.8 [205.816] |
|      | 941.1 [11.691]  |
| C    | 831.2 [188.0]   |
|      | 938.1 [7.685]   |

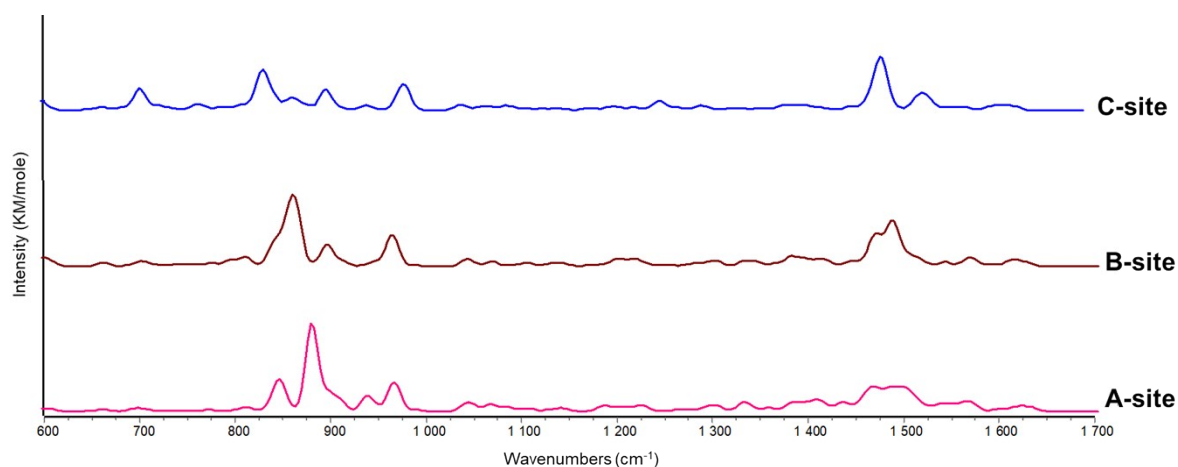

**Fig. S3** Calculated IR spectra of  $C_{70}$ -(pip)<sub>2</sub> complexes at different sites for the observation of the C-N stretching and N-H bending vibrations.

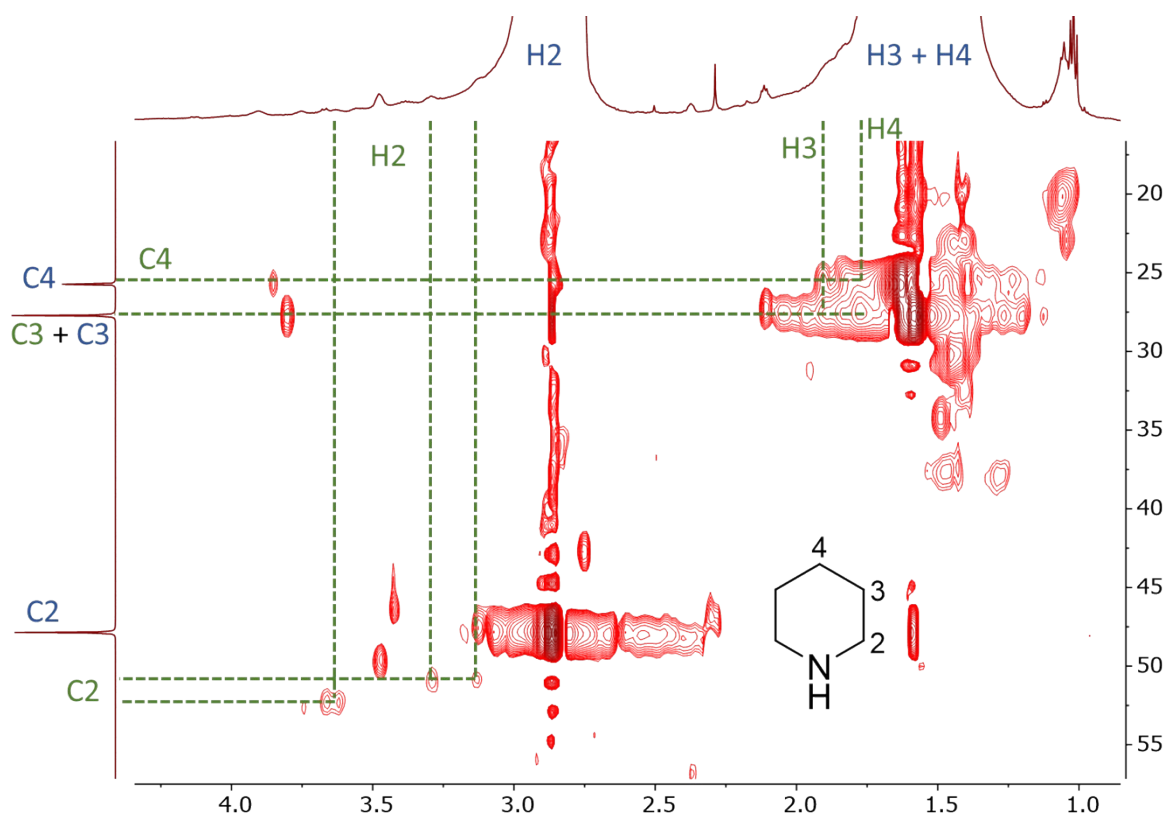

**Fig. S4** <sup>1</sup>H,<sup>13</sup>C-HSQC experiment of the  $C_{70}$ -piperidine mixture showing correlations between signals of directly attached proton and carbon atoms. The signals of the complex are highlighted by green dashed lines.

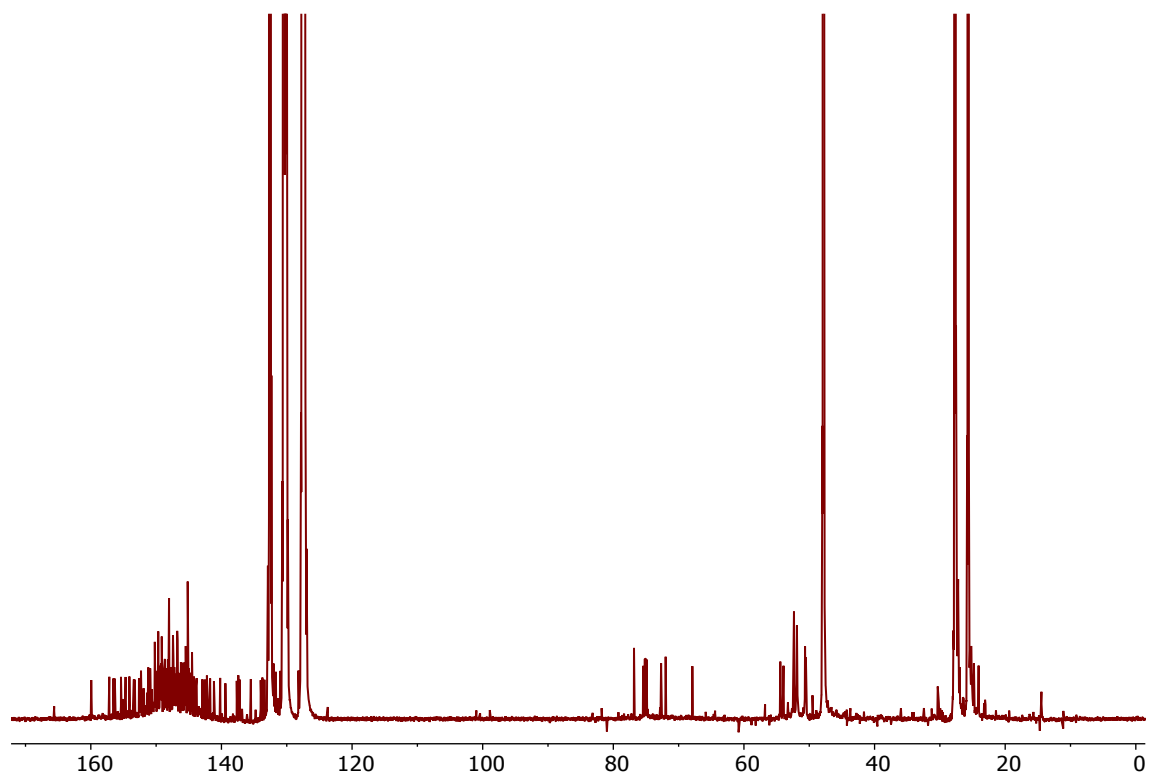

**Fig. S5** Carbon NMR spectrum obtained one day after dissolution of  $C_{70}$  and piperidine in deuterated 1,2-dichlorobenzene.

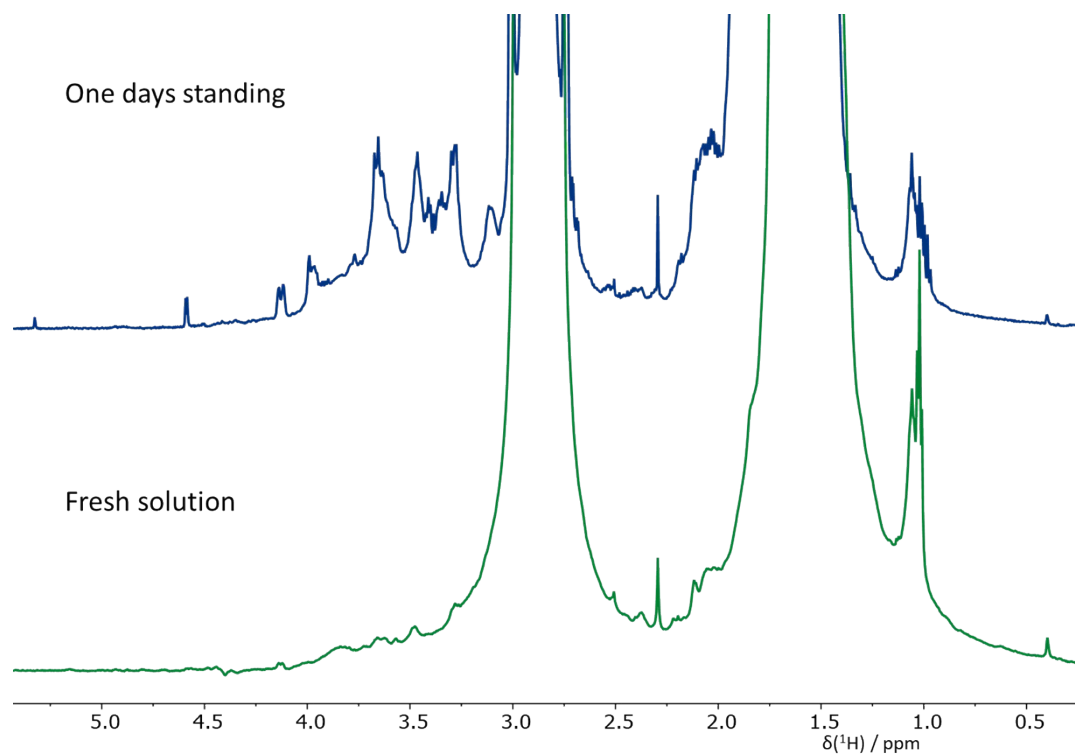

**Fig. S6** Proton NMR spectrum of freshly prepared solution of  $C_{70}$  and piperidine in deuterated 1,2-dichlorobenzene and of the same solution after one day standing.

**Table S4** Calculated  $^1\text{H}$  chemical shift (in ppm) for isolated piperidine and  $\text{C}_{70}\dots(\text{pip})_2$ .

|                                    | $\text{H}_{2_{\text{eq}}}(\text{inner pip})$ | $\text{H}_{2_{\text{ax}}}(\text{inner pip})$ | $\text{H}_{2_{\text{eq}}}(\text{outer pip})$ | $\text{H}_{2_{\text{ax}}}(\text{outer pip})$ |
|------------------------------------|----------------------------------------------|----------------------------------------------|----------------------------------------------|----------------------------------------------|
| piperidine                         | 2.8                                          | 2.4                                          |                                              |                                              |
| $\text{C}_{70}\dots(\text{pip})_2$ | 4.1                                          | 3.6                                          | 3.8, 3.3                                     | 2.7                                          |

**Table S5.** Fukui indices for nucleophilic attack for different carbon sites

|                 |                      | $f_k^+$ |
|-----------------|----------------------|---------|
| $\text{C}_{70}$ | A-site               | 0.038   |
|                 | B-site               | 0.022   |
|                 | C-site               | 0.007   |
| pyrene          | Planar               | -0.001  |
|                 | from CNT             | 0.0002  |
|                 | from $\text{C}_{70}$ | 0.001   |

The full xyz geometries of all investigated complexes optimized at PBE0-D3/def2-TZVPP level.

$\text{C}_{70}$   
70

|   |              |              |              |
|---|--------------|--------------|--------------|
| C | -0.338270805 | 0.652465619  | 3.800393636  |
| C | -0.310118997 | 1.974579439  | 3.182059184  |
| C | 0.915342977  | 2.456401861  | 2.675049707  |
| C | 2.141287668  | 1.717115374  | 2.838674889  |
| C | 2.114682991  | 0.468296312  | 3.422731840  |
| C | 0.861171945  | -0.087886436 | 3.865030448  |
| C | 0.881996446  | -1.487628626 | 3.595887610  |
| C | 2.148489445  | -1.803986279 | 2.985839909  |
| C | 2.924948413  | -0.595197667 | 2.887868522  |
| C | 3.727866474  | -0.370172040 | 1.779683476  |
| C | 3.789856878  | -1.356255133 | 0.727268258  |
| C | 3.046030448  | -2.522147481 | 0.831277877  |
| C | 2.207662849  | -2.745898628 | 1.980514570  |
| C | 1.002561785  | -3.406658124 | 1.547683105  |
| C | 1.080738782  | -3.582554860 | 0.135198786  |
| C | 2.334579075  | -3.031449239 | -0.312461333 |

|   |              |              |              |
|---|--------------|--------------|--------------|
| C | 2.397754654  | -2.364779186 | -1.517848187 |
| C | 3.175286582  | -1.158327908 | -1.634632714 |
| C | 3.856032986  | -0.658344480 | -0.534618353 |
| C | -0.233397353 | -3.182541184 | 2.190434488  |
| C | -0.296054123 | -2.185319043 | 3.254755916  |
| C | 3.755733374  | 0.937163678  | 1.168249658  |
| C | 3.834950407  | 0.759083312  | -0.262073494 |
| C | -1.531122822 | -0.098244341 | 3.733897788  |
| C | -1.510302467 | -1.497986658 | 3.464765210  |
| C | -1.389718844 | -3.417021775 | 1.416573495  |
| C | -2.640551474 | -2.766888223 | 1.714796557  |
| C | -2.699754734 | -1.824991882 | 2.720122355  |
| C | -3.471293624 | -0.622921576 | 2.537319512  |
| C | -2.733550603 | 0.447289592  | 3.157042705  |
| C | 1.209443067  | -2.224332531 | -2.320610690 |
| C | 1.236933557  | -0.933268326 | -2.924399760 |
| C | 2.442389572  | -0.268923602 | -2.498082574 |
| C | 2.422264624  | 1.085046476  | -2.237767202 |
| C | 3.134100192  | 1.611537364  | -1.102054319 |
| C | -0.008032610 | -2.833360835 | -1.949387068 |
| C | -0.074912510 | -3.539137531 | -0.673236297 |
| C | -1.311556295 | -3.592906356 | 0.004081918  |
| C | -1.182861443 | -2.234719431 | -2.451738700 |
| C | -2.450523466 | -2.385807362 | -1.783572496 |
| C | -2.513676389 | -3.052436679 | -0.578172933 |
| C | -3.350207105 | -2.549841623 | 0.480719314  |
| C | 1.195912453  | 1.825234674  | -2.394046006 |
| C | 1.134708613  | 2.798986543  | -1.354703109 |
| C | 2.322908875  | 2.665836293  | -0.550553845 |
| C | 2.247277737  | 2.835953838  | 0.815725893  |
| C | 2.979372437  | 1.959551347  | 1.693026540  |
| C | 0.026393990  | 1.217534987  | -2.897905837 |
| C | 0.047706787  | -0.215885639 | -3.173511933 |
| C | -1.155365372 | -0.943653413 | -3.055539828 |
| C | -1.196386484 | 1.814843321  | -2.525135096 |
| C | -2.426014392 | 1.063987938  | -2.503436838 |
| C | -2.405883512 | -0.289960557 | -2.763789034 |
| C | -3.221028408 | -1.186066841 | -1.985188619 |
| C | 0.980649530  | 3.145610957  | 1.428895912  |
| C | -0.177708430 | 3.371886167  | 0.655638571  |
| C | -0.097650441 | 3.191734812  | -0.790821382 |
| C | -1.257574850 | 2.788614974  | -1.485814253 |
| C | -1.411639660 | 3.135235923  | 1.297789430  |
| C | -2.600956810 | 2.814917676  | 0.550020625  |

|   |              |              |              |
|---|--------------|--------------|--------------|
| C | -2.525353235 | 2.644804011  | -0.816258832 |
| C | -3.262220909 | 1.583776733  | -1.452596251 |
| C | -1.476945918 | 2.446013808  | 2.543932848  |
| C | -2.706968630 | 1.696089572  | 2.572966249  |
| C | -3.416917888 | 1.931816404  | 1.342480935  |
| C | -4.150231607 | -0.404332570 | 1.347927419  |
| C | -4.122411268 | 0.903012767  | 0.736482563  |
| C | -4.043264104 | 0.724914961  | -0.693844984 |
| C | -4.088266161 | -1.390399599 | 0.295495943  |
| C | -4.022171886 | -0.692503163 | -0.966390233 |

**C<sub>70</sub>-pip A DB**

Subsystem A:1-70, subsystem B:71-87

87

|   |              |              |              |
|---|--------------|--------------|--------------|
| C | 2.704105554  | -2.190201780 | 1.048080161  |
| C | 1.793342562  | -2.348583834 | 2.150658990  |
| C | 3.410853917  | -1.005334097 | 0.886647881  |
| C | 1.618300057  | -1.322317921 | 3.056749578  |
| C | 0.302282367  | -1.013135526 | 3.549032719  |
| C | -0.819891280 | -1.785557509 | 3.185124964  |
| C | -2.072441739 | -1.135929091 | 3.238457707  |
| C | 2.961641508  | -1.049632083 | -1.518227321 |
| C | 2.227897705  | -2.275556317 | -1.345058073 |
| C | 3.542263158  | -0.423419443 | -0.422694390 |
| C | 2.101929848  | -2.833391667 | -0.089881926 |
| C | 0.840657710  | -3.402226546 | 0.315779130  |
| C | -0.250230986 | -3.488332189 | -0.572914015 |
| C | -1.533542614 | -3.537802518 | 0.016926487  |
| C | -0.638414424 | -2.872152048 | 2.225308618  |
| C | 0.650118720  | -3.098838111 | 1.696703790  |
| C | -1.722079100 | -3.232879115 | 1.396216968  |
| C | 2.768942519  | 1.751502288  | -1.248114405 |
| C | 2.163686792  | 1.093042612  | -2.377918427 |
| C | 3.440081898  | 1.012462232  | -0.286071877 |
| C | 2.261021991  | -0.277357824 | -2.509676309 |
| C | 1.116853481  | -1.031870371 | -2.954066228 |
| C | -0.079067549 | -0.395067668 | -3.348243922 |
| C | -1.255815410 | -1.168000982 | -3.249878160 |
| C | -0.116937048 | -2.898032333 | -1.901142074 |
| C | 1.097105162  | -2.266539133 | -2.239579458 |
| C | -1.277152952 | -2.402361915 | -2.537919967 |
| C | 2.398084963  | 2.346409399  | 1.484068338  |
| C | 1.699903960  | 3.106305405  | 0.480206428  |



|   |              |              |              |
|---|--------------|--------------|--------------|
| C | 3.249904927  | 1.315948689  | 1.111576799  |
| C | 1.878699827  | 2.813621600  | -0.855773011 |
| C | 0.748141730  | 2.820076920  | -1.750322695 |
| C | -0.532904263 | 3.209562748  | -1.314027199 |
| C | -1.634036882 | 2.691252221  | -2.038673441 |
| C | -0.178238557 | 1.055952342  | -3.208406275 |
| C | 0.928625764  | 1.760638233  | -2.692109263 |
| C | -1.449022638 | 1.624853889  | -2.973425181 |
| C | 2.352579495  | -0.092342879 | 2.900651782  |
| C | 1.463936114  | 0.976875354  | 3.277033541  |
| C | 3.227010762  | 0.068933980  | 1.836927725  |
| C | 1.488564619  | 2.170383496  | 2.586076663  |
| C | 0.249368391  | 2.834116872  | 2.269051898  |
| C | -0.988435498 | 2.339193171  | 2.729150463  |
| C | -2.118341424 | 2.690138447  | 1.960471256  |
| C | -0.724471470 | 3.508164154  | 0.098872704  |
| C | 0.379657604  | 3.411098363  | 0.970815504  |
| C | -1.989210938 | 3.261979250  | 0.673784220  |
| C | -1.012859326 | 1.084120694  | 3.468345880  |
| C | 0.203067467  | 0.406278501  | 3.680878806  |
| C | -2.177781528 | 0.283314706  | 3.379300257  |
| C | -3.990557927 | 2.041497243  | 0.707422454  |
| C | -3.326953173 | 1.891861971  | 1.956044503  |
| C | -3.361184178 | 0.721813473  | 2.699050419  |
| C | -4.813547019 | 0.946406631  | 0.138083251  |
| C | -3.569963352 | 1.394709521  | -2.025033305 |
| C | -2.943150260 | 2.573031279  | -1.466248981 |
| C | -3.119403417 | 2.810847725  | -0.111772925 |
| C | -4.401023422 | 0.582619379  | -1.279100025 |
| C | -3.382072967 | -1.402017630 | -2.312061590 |
| C | -2.549833128 | -0.549300634 | -3.103179077 |
| C | -2.636134152 | 0.820776068  | -2.959148682 |
| C | -4.260821332 | -0.838131766 | -1.391609127 |
| C | -3.639709513 | -2.542992133 | 0.255163335  |
| C | -2.707207513 | -3.102653080 | -0.693362827 |
| C | -2.581440668 | -2.545661462 | -1.946602024 |
| C | -4.392469420 | -1.421130222 | -0.079846950 |
| C | -3.983335916 | -0.436002080 | 2.094153446  |
| C | -3.177958750 | -1.578749511 | 2.439888826  |
| C | -3.015825498 | -2.613018076 | 1.540279478  |
| C | -4.616560616 | -0.371969865 | 0.868781061  |
| N | -6.363654815 | 1.324943279  | 0.150465146  |
| C | -6.859085327 | 1.514884301  | 1.535235369  |
| C | -6.633117959 | 2.511719198  | -0.696943257 |

|   |              |             |              |
|---|--------------|-------------|--------------|
| C | -8.106344145 | 2.860931688 | -0.710144622 |
| C | -8.335704326 | 1.849110874 | 1.554931869  |
| C | -8.638618793 | 3.068459251 | 0.698807365  |
| H | -6.250595385 | 2.287220068 | -1.691718675 |
| H | -6.027488022 | 3.315865678 | -0.274247454 |
| H | -6.253213524 | 2.320781568 | 1.954245722  |
| H | -6.632746940 | 0.601347080 | 2.083418194  |
| H | -8.634911782 | 2.011140975 | 2.592030496  |
| H | -8.912359135 | 0.988955566 | 1.196505791  |
| H | -8.669124581 | 2.063191175 | -1.207898283 |
| H | -8.238731557 | 3.757886133 | -1.317851755 |
| H | -8.164448617 | 3.950601490 | 1.140910042  |
| H | -9.712027831 | 3.262734423 | 0.676893925  |
| H | -6.830549987 | 0.515257757 | -0.258376771 |

### C<sub>70</sub>...pip A vdW

Subsystem A:1-70, subsystem B:71-87

87

|   |              |              |              |
|---|--------------|--------------|--------------|
| C | -3.816045862 | 0.455036712  | 0.019204492  |
| C | -3.263593323 | 1.596279727  | 0.581950348  |
| C | -2.659951446 | 1.539819385  | 1.888620456  |
| C | -2.639671253 | 0.354570012  | 2.593517226  |
| C | -3.215367569 | -0.833127953 | 2.014893774  |
| C | -3.786281329 | -0.788216671 | 0.752626578  |
| C | -1.502278919 | 2.397394174  | 1.898335153  |
| C | -1.371865937 | 2.973901122  | 0.601107797  |
| C | -2.448313491 | 2.475394039  | -0.216469282 |
| C | -0.104620456 | 3.269005012  | 0.054491677  |
| C | 0.985271938  | 3.225365002  | 0.949703240  |
| C | 0.854839406  | 2.648749662  | 2.247130890  |
| C | -0.369076935 | 2.099857321  | 2.685193482  |
| C | 2.328807344  | 2.983342455  | 0.489029484  |
| C | 3.041861193  | 2.263536906  | 1.512394172  |
| C | 2.117087367  | 2.047396383  | 2.594936145  |
| C | 2.555162113  | 2.697746577  | -0.840980160 |
| C | 3.505175857  | 1.679714417  | -1.208261812 |
| C | 4.189056383  | 0.977522891  | -0.227124463 |
| C | 3.951909503  | 1.276309735  | 1.165113957  |
| C | 4.359618413  | -0.450356248 | -0.354200394 |
| C | 3.837578628  | -1.110350393 | -1.456993744 |
| C | 3.121261462  | -0.376768900 | -2.467936105 |
| C | 2.958496438  | 0.987212957  | -2.346497682 |
| C | 4.227615691  | -1.033979960 | 0.958976703  |

|   |              |              |              |
|---|--------------|--------------|--------------|
| C | 3.579564680  | -2.251164527 | 1.109880993  |
| C | 3.032843671  | -2.927333353 | -0.037829805 |
| C | 3.158982821  | -2.369653334 | -1.292658779 |
| C | 3.975386630  | 0.032974005  | 1.898179930  |
| C | 3.087644437  | -0.166088183 | 2.944941947  |
| C | 2.411870383  | -1.429406173 | 3.091069441  |
| C | 2.652636247  | -2.448642025 | 2.193908064  |
| C | 1.792442727  | -3.552741320 | 0.345456999  |
| C | 1.558103951  | -3.257399599 | 1.720239990  |
| C | 0.249204471  | -3.094297975 | 2.221577137  |
| C | -0.005373986 | -2.015321298 | 3.171501244  |
| C | 1.068484012  | -1.181222196 | 3.548744056  |
| C | 2.139354738  | 0.859541241  | 3.295096055  |
| C | 0.900370769  | 0.228976753  | 3.673985476  |
| C | -0.345606821 | 0.843321182  | 3.427087782  |
| C | -1.457865777 | -0.019933004 | 3.326267891  |
| C | -1.289296950 | -1.430583536 | 3.200068927  |
| C | -0.799302532 | -3.506983758 | 1.372211621  |
| C | -2.125253111 | -2.955123217 | 1.488759928  |
| C | -2.365143070 | -1.935034522 | 2.385753874  |
| C | 2.026050344  | -1.188613006 | -2.934670804 |
| C | 2.049434717  | -2.416585902 | -2.210982112 |
| C | 0.857884665  | -3.102488056 | -1.894081724 |
| C | 0.724338294  | -3.692848631 | -0.565681992 |
| C | -0.565020943 | -3.802439100 | -0.002699411 |
| C | -0.308067485 | -2.666433936 | -2.558814022 |
| C | -1.618415781 | -2.876010448 | -1.997956614 |
| C | -1.744556986 | -3.433714568 | -0.743128681 |
| C | -2.723415667 | -2.919339470 | 0.180039061  |
| C | 1.446647201  | 2.644014311  | -1.759989913 |
| C | 1.695434746  | 1.590488874  | -2.687785862 |
| C | 0.638465053  | 0.831027591  | -3.232951873 |
| C | 0.810467756  | -0.613007535 | -3.361496433 |
| C | -0.331382498 | -1.438294783 | -3.282513370 |
| C | -0.662483778 | 1.340512385  | -3.035058611 |
| C | -1.818585409 | 0.481316961  | -3.051185604 |
| C | -1.656581481 | -0.883056259 | -3.173532765 |
| C | -2.465245504 | -1.777977250 | -2.388072193 |
| C | 0.134951934  | 2.967853483  | -1.353239853 |
| C | -0.911600934 | 2.395089759  | -2.107654370 |
| C | -2.223320352 | 2.195210276  | -1.547987585 |
| C | -2.797857450 | 1.012718425  | -2.138392909 |
| C | -3.572690089 | 0.156090551  | -1.372167933 |
| C | -3.534102726 | -1.854706315 | -0.185650788 |

|   |              |              |              |
|---|--------------|--------------|--------------|
| C | -3.402030687 | -1.270782632 | -1.499506663 |
| N | -6.604732548 | 1.027670928  | -0.006679060 |
| C | -7.893108722 | 3.466708525  | 0.951963930  |
| C | -7.742751291 | 3.182890733  | -0.536612715 |
| C | -6.561314608 | 2.252172550  | -0.783875807 |
| C | -6.782552767 | 1.271941820  | 1.412490577  |
| C | -7.971945580 | 2.166680088  | 1.741093838  |
| H | -6.481603081 | 1.990206252  | -1.841435265 |
| H | -5.633687288 | 2.775039307  | -0.518147398 |
| H | -5.864953034 | 1.749390094  | 1.779258094  |
| H | -6.861190607 | 0.309755890  | 1.923778994  |
| H | -8.003478384 | 2.366497993  | 2.815891585  |
| H | -8.899577612 | 1.640005897  | 1.488273654  |
| H | -8.657692586 | 2.711659111  | -0.914281246 |
| H | -7.609946645 | 4.112406848  | -1.097385898 |
| H | -7.024968660 | 4.041619541  | 1.295783713  |
| H | -8.772658009 | 4.087054626  | 1.140240836  |
| H | -7.330457026 | 0.414029553  | -0.353669512 |

### **C<sub>70</sub>-pip<sub>2</sub> A DB**

Interaction energy between piperidines and C<sub>70</sub>: subsystem A:1-70, subsystem B:71-104

Strenght of H-bond: subsystem A:1-87, subsystem B:88-104  
104

|   |              |              |              |
|---|--------------|--------------|--------------|
| C | -4.991140317 | 1.090002973  | 0.123726419  |
| C | -4.100248375 | 2.145544535  | 0.692952170  |
| C | -3.441866310 | 1.970182298  | 1.937785106  |
| C | -3.517625369 | 0.801460031  | 2.682256280  |
| C | -4.181595383 | -0.332013948 | 2.074517304  |
| C | -4.815350635 | -0.241363392 | 0.851953821  |
| C | -3.205496981 | 2.882988869  | -0.125137600 |
| C | -3.040265861 | 2.644418854  | -1.482355518 |
| C | -3.709513731 | 1.488691025  | -2.039975892 |
| C | -4.568121512 | 0.707781112  | -1.293046559 |
| C | -4.472645689 | -0.715154038 | -1.407572282 |
| C | -4.624794737 | -1.295958126 | -0.096881740 |
| C | -2.056189411 | 3.292816295  | 0.658126595  |
| C | -2.203459636 | 2.724214811  | 1.943185915  |
| C | -1.086076504 | 2.331343543  | 2.709123329  |
| C | -1.154749873 | 1.076493206  | 3.445831306  |
| C | -2.349270208 | 0.319121139  | 3.356668087  |
| C | -2.294603513 | -1.103359726 | 3.213273034  |
| C | -3.415479146 | -1.503996330 | 2.415487757  |

|   |              |              |              |
|---|--------------|--------------|--------------|
| C | -3.293595219 | -2.545028543 | 1.516850504  |
| C | -3.915464090 | -2.448896303 | 0.233257032  |
| C | 0.168144280  | 2.782143392  | 2.248055089  |
| C | 0.316835337  | 3.356162164  | 0.950738875  |
| C | -0.784898200 | 3.494118521  | 0.081195283  |
| C | -0.607025258 | 3.190851282  | -1.332521026 |
| C | -1.728902166 | 2.713892904  | -2.055214132 |
| C | 0.657628820  | 2.755715205  | -1.771909622 |
| C | 1.789275527  | 2.706977821  | -0.879794730 |
| C | 1.624171322  | 3.004049584  | 0.456931599  |
| C | 2.296353115  | 2.217715195  | 1.458074167  |
| C | 1.382966887  | 2.072902127  | 2.561356325  |
| C | 1.315904815  | 0.879689891  | 3.249904153  |
| C | 0.035543169  | 0.354547603  | 3.654695852  |
| C | 2.639612601  | 1.613922082  | -1.275556202 |
| C | 3.285860553  | 0.849586333  | -0.316235271 |
| C | 3.109508393  | 1.157508325  | 1.082172398  |
| C | 3.042697037  | -0.089110972 | 1.805264773  |
| C | 2.164407477  | -0.220389359 | 2.869944981  |
| C | 0.798690765  | 1.692160966  | -2.716673696 |
| C | 2.008799851  | 0.979745040  | -2.405401034 |
| C | 2.057371954  | -0.393232356 | -2.540030556 |
| C | 2.731307120  | -1.191855256 | -1.551168951 |
| C | 3.336494522  | -0.589045513 | -0.455378189 |
| C | 3.186505331  | -1.167858980 | 0.852776624  |
| C | 2.437318414  | -2.326804982 | 1.013813884  |
| C | 1.810564329  | -2.945958544 | -0.124052995 |
| C | 1.954390387  | -2.390836074 | -1.378688032 |
| C | 0.823066095  | -2.339957890 | -2.271236308 |
| C | 0.885797629  | -1.105037719 | -2.983218957 |
| C | -0.287042944 | -0.424640244 | -3.374310085 |
| C | -0.333969666 | 1.028759829  | -3.231308614 |
| C | 1.386305030  | -1.423297393 | 3.025416090  |
| C | 1.523504894  | -2.454180290 | 2.117684698  |
| C | 0.353118527  | -3.161634611 | 1.664503057  |
| C | 0.530363621  | -3.470089112 | 0.282745576  |
| C | -0.564470709 | -3.515327820 | -0.604004882 |
| C | -0.412291227 | -2.927814124 | -1.931666322 |
| C | 0.083630537  | -1.067930885 | 3.521045649  |
| C | -1.066286590 | -1.798101156 | 3.157293798  |
| C | -0.925488787 | -2.889489422 | 2.196023740  |
| C | -1.847801123 | -3.519838928 | -0.011589540 |
| C | -2.022991395 | -3.210396800 | 1.368737167  |
| C | -3.005648212 | -3.039975922 | -0.718656282 |

|   |               |              |              |
|---|---------------|--------------|--------------|
| C | -1.490675267  | -1.155139098 | -3.275887656 |
| C | -1.555058266  | -2.389489861 | -2.565918627 |
| C | -2.861991382  | -2.485464888 | -1.971336096 |
| C | -2.761318296  | -0.490166618 | -3.126532457 |
| C | -3.621252682  | -1.312663381 | -2.333944055 |
| C | -1.583238004  | 1.642624877  | -2.992459445 |
| C | -2.797431691  | 0.881787176  | -2.976256127 |
| C | -6.707718498  | 2.717990768  | -0.696643956 |
| N | -6.487507737  | 1.517564405  | 0.139975695  |
| C | -6.964389017  | 1.727940437  | 1.524810101  |
| C | -6.964389017  | 1.727940437  | 1.524810101  |
| C | -8.427213026  | 2.119998061  | 1.554285714  |
| C | -8.685905869  | 3.351470057  | 0.701828256  |
| C | -8.167955083  | 3.120068853  | -0.708190996 |
| H | -6.342751691  | 2.483580410  | -1.695882563 |
| H | -6.076686223  | 3.508221126  | -0.283401492 |
| H | -6.331367494  | 2.506105408  | 1.957499557  |
| H | -6.780850349  | 0.803298711  | 2.070832752  |
| H | -8.714480193  | 2.292741553  | 2.593174137  |
| H | -9.037217500  | 1.285389171  | 1.194037204  |
| H | -8.758684823  | 2.337451140  | -1.196081512 |
| H | -8.272139443  | 4.018634077  | -1.319174695 |
| H | -8.173335782  | 4.213613580  | 1.140966826  |
| H | -9.750869763  | 3.589702802  | 0.685423647  |
| H | -7.026819119  | 0.706214602  | -0.289798493 |
| N | -7.768149572  | -0.686641170 | -1.060078555 |
| C | -9.005024959  | -1.201007169 | -0.475848278 |
| C | -7.883971553  | -0.489237869 | -2.505809624 |
| C | -8.337229913  | -1.739401630 | -3.241879906 |
| C | -9.497645666  | -2.474134475 | -1.146900229 |
| C | -9.634619855  | -2.272982692 | -2.650001858 |
| H | -8.606409627  | 0.318601178  | -2.670465768 |
| H | -6.918404132  | -0.143056912 | -2.879697278 |
| H | -8.840833717  | -1.360883831 | 0.592428115  |
| H | -9.765807578  | -0.417524341 | -0.571635843 |
| H | -8.455209584  | -1.519645977 | -4.305696507 |
| H | -7.552452729  | -2.499868165 | -3.162359638 |
| H | -10.441816908 | -1.557315182 | -2.845825184 |
| H | -9.922493390  | -3.207504906 | -3.135941365 |
| H | -10.449507463 | -2.780590310 | -0.705935557 |
| H | -8.782541757  | -3.279866896 | -0.946959755 |
| H | -7.025017959  | -1.359080218 | -0.890900907 |

### C<sub>70</sub>-pip B DB

Subsystem A:1-70, subsystem B:71-87

87

|   |              |              |              |
|---|--------------|--------------|--------------|
| C | 3.003077704  | -3.056720933 | -0.139551917 |
| C | 2.156773652  | -3.599285903 | 0.881213360  |
| C | 3.806635314  | -1.960583726 | 0.141508099  |
| C | 2.156077094  | -3.025983188 | 2.136507727  |
| C | 0.907953620  | -2.853821334 | 2.839013874  |
| C | -0.307752962 | -3.347390913 | 2.306439638  |
| C | -1.476607758 | -2.712604412 | 2.758070498  |
| C | 3.218384950  | -0.954980992 | -2.007211758 |
| C | 2.370352296  | -2.087315126 | -2.285172416 |
| C | 3.919665935  | -0.887686373 | -0.812275734 |
| C | 2.268751134  | -3.119088895 | -1.376612602 |
| C | 0.983601574  | -3.718247051 | -1.116179065 |
| C | -0.168184443 | -3.341907138 | -1.843995331 |
| C | -1.406296306 | -3.549000435 | -1.201816641 |
| C | -0.305066519 | -3.944250534 | 0.974575624  |
| C | 0.913839125  | -4.014034186 | 0.273518268  |
| C | -1.474237073 | -3.847548370 | 0.190800474  |
| C | 3.351204037  | 1.485187820  | -0.590531366 |
| C | 2.603536287  | 1.397098682  | -1.820635892 |
| C | 3.992185450  | 0.356455470  | -0.078073991 |
| C | 2.544323351  | 0.209408279  | -2.518351557 |
| C | 1.300083225  | -0.208424780 | -3.115861309 |
| C | 0.155309230  | 0.616141793  | -3.093976231 |
| C | -1.088744884 | -0.041883999 | -3.201757684 |
| C | -0.056723424 | -2.253854114 | -2.810626812 |
| C | 1.195501725  | -1.623424169 | -2.977238780 |
| C | -1.193660714 | -1.457414208 | -3.064221074 |
| C | 3.180567466  | 0.853381926  | 2.167217498  |
| C | 2.511147850  | 2.021003527  | 1.636005126  |
| C | 3.950539013  | 0.057588823  | 1.323805560  |
| C | 2.596447842  | 2.323748364  | 0.288611716  |
| C | 1.416785881  | 2.783569387  | -0.400307900 |
| C | 0.208812628  | 3.034131058  | 0.287619789  |
| C | -0.973025783 | 2.955301028  | -0.480449211 |
| C | 0.219933641  | 1.877052290  | -2.360172038 |
| C | 1.423947121  | 2.217918013  | -1.709421370 |
| C | -0.967330907 | 2.384129242  | -1.788955542 |
| C | 3.030219478  | -1.939401430 | 2.459404891  |
| C | 2.374594466  | -1.101484265 | 3.537892143  |
| C | 3.805017946  | -1.383493197 | 1.462117130  |
| C | 2.382038886  | 0.330720539  | 3.226977856  |

|   |              |              |              |
|---|--------------|--------------|--------------|
| C | 1.189230505  | 1.103825526  | 3.278316550  |
| C | -0.076651499 | 0.583788867  | 3.646396686  |
| C | -1.205654499 | 1.301989643  | 3.213009081  |
| C | 0.136830784  | 2.724296017  | 1.712773090  |
| C | 1.282806673  | 2.183166209  | 2.335790701  |
| C | -1.108165095 | 2.376510906  | 2.269796781  |
| C | -0.177547245 | -0.868498955 | 3.774970861  |
| C | 0.973177136  | -1.665022237 | 3.600503639  |
| C | -1.411782833 | -1.484414252 | 3.477947744  |
| C | -3.173335867 | 1.326509627  | 1.941418118  |
| C | -2.477273394 | 0.654293634  | 3.008432864  |
| C | -2.581010057 | -0.713848542 | 3.143444727  |
| C | -3.939521387 | 0.600753972  | 1.042155337  |
| C | -3.040320684 | 1.922646349  | -0.809036206 |
| C | -2.248114421 | 2.676457674  | 0.127192706  |
| C | -2.305275871 | 2.377716797  | 1.474277983  |
| C | -3.875670936 | 0.907170159  | -0.368169336 |
| C | -3.165921630 | -0.507797409 | -2.237225290 |
| C | -2.300026456 | 0.547176468  | -2.689818309 |
| C | -2.235631678 | 1.736071337  | -1.990559447 |
| C | -3.936666858 | -0.336567340 | -1.095910485 |
| C | -3.379348330 | -2.608004057 | -0.365145293 |
| C | -2.574939700 | -2.776637325 | -1.547017456 |
| C | -2.468575828 | -1.749783293 | -2.460419933 |
| C | -4.044463293 | -1.411439541 | -0.137100354 |
| C | -3.382978863 | -1.473200745 | 2.219570044  |
| C | -2.688551753 | -2.709176887 | 1.975791167  |
| C | -2.683072515 | -3.262038225 | 0.712371079  |
| C | -4.048090757 | -0.831977011 | 1.183676541  |
| N | 3.118732130  | -1.411926203 | 4.949048665  |
| C | 5.260879465  | -1.303602350 | 6.189898766  |
| C | 4.543473843  | -1.015489778 | 4.887689769  |
| C | 4.562548385  | -0.636507429 | 7.364080049  |
| C | 3.098483925  | -1.044488540 | 7.399589929  |
| C | 2.415386699  | -0.762187414 | 6.077536490  |
| H | 6.292023338  | -0.957877133 | 6.096399964  |
| H | 4.986923454  | -1.543833696 | 4.044664547  |
| H | 5.309616754  | -2.386423359 | 6.351087000  |
| H | 4.540052333  | 0.051579888  | 4.654290676  |
| H | 5.055217163  | -0.899223950 | 8.301518148  |
| H | 4.634916583  | 0.450931243  | 7.260332169  |
| H | 3.014367702  | -2.111236776 | 7.635836243  |
| H | 2.409864119  | 0.304751327  | 5.843497522  |
| H | 2.559327813  | -0.510363714 | 8.184169151  |



|   |             |              |             |
|---|-------------|--------------|-------------|
| H | 1.385579904 | -1.116432876 | 6.062450245 |
| H | 3.057035592 | -2.424203176 | 5.054274026 |

### C<sub>70</sub>...pip B vdW

Subsystem A:1-70, subsystem B:71-87

87

|   |              |              |              |
|---|--------------|--------------|--------------|
| C | 1.876450730  | -1.114792771 | 2.551138168  |
| C | 2.608202606  | -1.957773085 | 1.641520784  |
| C | 1.740333276  | -3.052459621 | 1.293441317  |
| C | 0.493246321  | -2.890744796 | 1.998496727  |
| C | 0.576834470  | -1.696390514 | 2.770387274  |
| C | 3.441649410  | -1.398159197 | 0.686438220  |
| C | 3.441230393  | -1.920649056 | -0.659443029 |
| C | 2.608518675  | -2.980833679 | -0.986843317 |
| C | 1.740440945  | -3.553485935 | 0.008918311  |
| C | 0.493194845  | -3.909861534 | -0.619786880 |
| C | 0.576435249  | -3.550206039 | -1.996433605 |
| C | 1.874948446  | -2.968959325 | -2.225894115 |
| C | 2.005369248  | -1.906550036 | -3.095385918 |
| C | 2.874846843  | -0.807301916 | -2.765448790 |
| C | 3.577276302  | -0.808558726 | -1.569396467 |
| C | -0.730365819 | -3.848277476 | 0.080343238  |
| C | -0.730285322 | -3.319315425 | 1.441259888  |
| C | 3.581188706  | 0.038225863  | 0.607230010  |
| C | 3.662608611  | 0.401611190  | -0.786210912 |
| C | -0.560348006 | -0.897431474 | 3.008747236  |
| C | -1.806929620 | -1.475390000 | 2.686364442  |
| C | -1.890680766 | -2.670220845 | 1.913352148  |
| C | -1.890916075 | -3.687223259 | -0.705906529 |
| C | -3.091801928 | -3.102019732 | -0.165632268 |
| C | -3.091635627 | -2.602694777 | 1.119728035  |
| C | -3.765660291 | -1.364205484 | 1.412203628  |
| C | -2.955862794 | -0.663220166 | 2.374884526  |
| C | 0.842144534  | -1.385771456 | -3.767809077 |
| C | 0.977018507  | 0.031178690  | -3.845753244 |
| C | 2.224336296  | 0.393749850  | -3.221908487 |
| C | 2.305218871  | 1.549471954  | -2.474312788 |
| C | 3.041280809  | 1.558204267  | -1.236199581 |
| C | -0.423492013 | -1.994565914 | -3.631481643 |
| C | -0.561699156 | -3.119213428 | -2.711007665 |
| C | -1.807763188 | -3.327872145 | -2.083031017 |
| C | -1.541903163 | -1.163642920 | -3.854619888 |

|   |              |              |              |
|---|--------------|--------------|--------------|
| C | -2.826270270 | -1.456212328 | -3.270760874 |
| C | -2.956618705 | -2.518257029 | -2.400969975 |
| C | -3.765930159 | -2.385532326 | -1.217303712 |
| C | 1.141909164  | 2.386189621  | -2.323294514 |
| C | 1.142003199  | 2.901486352  | -0.994320084 |
| C | 2.306512913  | 2.387327418  | -0.318270426 |
| C | 2.224490771  | 2.037810297  | 1.013883280  |
| C | 2.874968017  | 0.843884080  | 1.487727463  |
| C | -0.064395099 | 2.102026360  | -2.998240841 |
| C | -0.150003529 | 0.878352353  | -3.789660880 |
| C | -1.407059517 | 0.253451742  | -3.932690086 |
| C | -1.242391671 | 2.608348193  | -2.409519718 |
| C | -2.526133318 | 1.999848193  | -2.649362213 |
| C | -2.607336095 | 0.844160127  | -3.397535113 |
| C | -3.499220116 | -0.212832515 | -2.996711663 |
| C | 0.978014722  | 2.192004151  | 1.719233378  |
| C | 0.843229612  | 1.093665071  | 2.617652621  |
| C | 2.007320071  | 0.255250577  | 2.476290250  |
| C | -0.149550263 | 2.779957052  | 1.106149161  |
| C | -0.063955800 | 3.147904784  | -0.304071824 |
| C | -1.242187553 | 3.124171779  | -1.080257023 |
| C | -1.406120609 | 2.417003247  | 1.634015780  |
| C | -2.605971939 | 2.490118833  | 0.839674035  |
| C | -2.526071129 | 2.838464203  | -0.492186107 |
| C | -3.333667218 | 2.151299124  | -1.466671221 |
| C | -0.422895774 | 0.554664617  | 2.930230235  |
| C | -1.540513764 | 1.317863383  | 2.532995623  |
| C | -2.824938737 | 0.707495272  | 2.299300332  |
| C | -3.498047336 | 1.439689995  | 1.257823893  |
| C | -4.409691740 | -0.665466036 | 0.401933258  |
| C | -4.272824729 | 0.769394160  | 0.323022420  |
| C | -4.188965089 | 1.133623506  | -1.071389010 |
| C | -4.410034478 | -1.188089289 | -0.943591110 |
| C | -4.273474560 | -0.076214439 | -1.854103199 |
| N | 3.100549465  | -1.848792190 | 5.058775738  |
| C | 2.306085467  | -0.988252238 | 5.915214848  |
| C | 4.418346920  | -1.304912666 | 4.788576902  |
| C | 5.195926802  | -0.918158158 | 6.041170331  |
| C | 4.369141820  | 0.019320663  | 6.911055597  |
| C | 3.004998851  | -0.588350087 | 7.209459911  |
| H | 6.145838740  | -0.452761115 | 5.763176224  |
| H | 4.975670596  | -2.026495098 | 4.186769805  |
| H | 5.439730873  | -1.824477169 | 6.607747356  |
| H | 4.282249198  | -0.412917212 | 4.163788957  |

|   |             |              |             |
|---|-------------|--------------|-------------|
| H | 4.898495090 | 0.254643417  | 7.837523921 |
| H | 4.229247326 | 0.968745090  | 6.380488458 |
| H | 3.129293915 | -1.476052409 | 7.840615231 |
| H | 2.072307845 | -0.081914051 | 5.342029435 |
| H | 2.381465809 | 0.114288268  | 7.769553597 |
| H | 1.354174390 | -1.483911623 | 6.119543575 |
| H | 3.176329302 | -2.773968027 | 5.461129259 |

### **C<sub>70</sub>-pip<sub>2</sub> B DB**

Interaction energy between piperidines and C<sub>70</sub>: subsystem A:1-70, subsystem B:71-104

Streight of H-bond: subsystem A:1-87, subsystem B:88-104  
104

|   |              |              |              |
|---|--------------|--------------|--------------|
| C | 2.821937377  | -3.203122264 | 0.073894669  |
| C | 1.938607306  | -3.651793627 | 1.107761799  |
| C | 3.670352759  | -2.130876647 | 0.314340942  |
| C | 1.951263442  | -3.012789645 | 2.331982378  |
| C | 0.703398839  | -2.744338279 | 3.005607567  |
| C | -0.527893235 | -3.211669038 | 2.484495825  |
| C | -1.670881829 | -2.504299218 | 2.891390032  |
| C | 3.156938470  | -1.207288388 | -1.889332808 |
| C | 2.259444528  | -2.311016556 | -2.123776076 |
| C | 3.845956334  | -1.113381022 | -0.688625287 |
| C | 2.099241589  | -3.291945041 | -1.168442329 |
| C | 0.783523361  | -3.815744671 | -0.896726872 |
| C | -0.341091767 | -3.421726084 | -1.657379916 |
| C | -1.595049905 | -3.537964819 | -1.022755300 |
| C | -0.538359832 | -3.875285481 | 1.184592432  |
| C | 0.683703637  | -4.037778230 | 0.504726674  |
| C | -1.693233734 | -3.763569894 | 0.381837537  |
| C | 3.390965701  | 1.292392579  | -0.593040818 |
| C | 2.653172953  | 1.177077176  | -1.826836215 |
| C | 3.970817715  | 0.160680027  | -0.014949578 |
| C | 2.545642213  | -0.039550352 | -2.466795770 |
| C | 1.289498699  | -0.427522208 | -3.059717935 |
| C | 0.185090496  | 0.450106360  | -3.094599112 |
| C | -1.087558359 | -0.153193799 | -3.187003126 |
| C | -0.166785642 | -2.389265774 | -2.674355428 |
| C | 1.116009218  | -1.827484712 | -2.853944032 |
| C | -1.261532733 | -1.553693511 | -2.982060581 |
| C | 3.156356601  | 0.804585576  | 2.190787598  |
| C | 2.550353083  | 1.976213990  | 1.592037268  |
| C | 3.901318602  | -0.065379139 | 1.398217170  |

|   |              |              |              |
|---|--------------|--------------|--------------|
| C | 2.666779007  | 2.207382919  | 0.232556046  |
| C | 1.517986162  | 2.686913881  | -0.494166687 |
| C | 0.315670463  | 3.027716805  | 0.164374014  |
| C | -0.859925133 | 2.966616911  | -0.614962419 |
| C | 0.301757907  | 1.741807773  | -2.423268779 |
| C | 1.513217441  | 2.057684594  | -1.774133607 |
| C | -0.866579555 | 2.332032283  | -1.894173452 |
| C | 2.874493577  | -1.958464226 | 2.619823416  |
| C | 2.259671812  | -1.043930502 | 3.673292605  |
| C | 3.683266448  | -1.490465542 | 1.605763958  |
| C | 2.324124092  | 0.374910197  | 3.262906658  |
| C | 1.171704947  | 1.201883942  | 3.259324631  |
| C | -0.123822535 | 0.763932605  | 3.637136564  |
| C | -1.211383183 | 1.511228531  | 3.152812008  |
| C | 0.213355150  | 2.792716023  | 1.602110053  |
| C | 1.325476622  | 2.230813533  | 2.265599621  |
| C | -1.053248310 | 2.533505960  | 2.159228472  |
| C | -0.294936916 | -0.674032464 | 3.833830448  |
| C | 0.819500905  | -1.529712153 | 3.714860761  |
| C | -1.554022773 | -1.245887845 | 3.550142024  |
| C | -3.161082541 | 1.564662410  | 1.853871077  |
| C | -2.509820540 | 0.914144086  | 2.961881226  |
| C | -2.681831818 | -0.438988572 | 3.163223654  |
| C | -3.951407020 | 0.832657785  | 0.981195627  |
| C | -2.969535178 | 2.017347256  | -0.919820167 |
| C | -2.153599788 | 2.779658760  | -0.011730018 |
| C | -2.238389899 | 2.549648179  | 1.347883226  |
| C | -3.858105785 | 1.065787504  | -0.441751531 |
| C | -3.195530039 | -0.471903627 | -2.229641627 |
| C | -2.275464724 | 0.517044594  | -2.721638824 |
| C | -2.161515566 | 1.734656645  | -2.080224952 |
| C | -3.969915216 | -0.208013027 | -1.108153500 |
| C | -3.530172973 | -2.464610262 | -0.259751349 |
| C | -2.721743554 | -2.729521591 | -1.421018604 |
| C | -2.555555251 | -1.754915406 | -2.381677064 |
| C | -4.139689511 | -1.227830633 | -0.099376765 |
| C | -3.508963128 | -1.204348125 | 2.266724302  |
| C | -2.872443059 | -2.482516223 | 2.093167051  |
| C | -2.878545523 | -3.096567253 | 0.857948657  |
| C | -4.130594912 | -0.584472134 | 1.191216829  |
| N | 2.944823274  | -1.303423938 | 5.061235869  |
| C | 5.072411099  | -1.257041772 | 6.325084468  |
| C | 4.388526754  | -0.990542944 | 4.999921909  |
| C | 4.403920653  | -0.490388215 | 7.454373660  |

|   |              |              |             |
|---|--------------|--------------|-------------|
| C | 2.918205846  | -0.808848903 | 7.483736556 |
| C | 2.273226058  | -0.545518431 | 6.138437634 |
| H | 6.124274663  | -0.980825044 | 6.230069734 |
| H | 4.812919643  | -1.591762674 | 4.196742964 |
| H | 5.047267479  | -2.330335207 | 6.540173202 |
| H | 4.467643348  | 0.060622621  | 4.712024174 |
| H | 4.867876830  | -0.734779235 | 8.411591508 |
| H | 4.543036442  | 0.584361901  | 7.298135558 |
| H | 2.770023254  | -1.858258537 | 7.760085505 |
| H | 2.333007411  | 0.510323723  | 5.863730902 |
| H | 2.401160523  | -0.210265619 | 8.236083266 |
| H | 1.223593725  | -0.836507564 | 6.131211028 |
| H | 2.820326362  | -2.341357309 | 5.254165433 |
| N | 2.468503317  | -4.056920418 | 5.460106059 |
| C | 3.546088819  | -4.909694935 | 5.956845143 |
| C | 1.224552460  | -4.253462259 | 6.205746745 |
| C | 0.775728477  | -5.705178760 | 6.240685101 |
| C | 3.173951162  | -6.384404032 | 5.987571823 |
| C | 1.887068032  | -6.599789145 | 6.772596213 |
| H | 0.457375797  | -3.616676790 | 5.760942548 |
| H | 1.393755878  | -3.894963662 | 7.227753725 |
| H | 3.793511506  | -4.572048898 | 6.970033768 |
| H | 4.430600980  | -4.742782901 | 5.337577932 |
| H | 3.994461167  | -6.964791368 | 6.416938877 |
| H | 3.041067313  | -6.737870166 | 4.958961375 |
| H | 2.065266108  | -6.364146525 | 7.828433751 |
| H | 1.587011027  | -7.649004586 | 6.734186919 |
| H | 0.503427950  | -6.015138744 | 5.225561158 |
| H | -0.126150285 | -5.799032920 | 6.850407734 |
| H | 2.294310940  | -4.288337646 | 4.485943470 |

### **C<sub>70</sub>...pip<sub>2</sub> B vdW**

Interaction energy between piperidines and C<sub>70</sub>: subsystem A:1-70, subsystem B:71-

104

104

|   |              |              |              |
|---|--------------|--------------|--------------|
| C | 2.386501000  | -1.169560000 | -0.202229000 |
| C | -4.124314000 | 2.780756000  | -0.977132000 |
| C | -4.699601000 | 2.073349000  | 0.068022000  |
| C | -4.150164000 | 2.169077000  | 1.395908000  |
| C | -3.054787000 | 2.972075000  | 1.633967000  |
| C | -2.457967000 | 3.715553000  | 0.554766000  |
| C | -2.976950000 | 3.620866000  | -0.728142000 |
| C | -2.006452000 | 2.510773000  | 2.508618000  |

|   |              |              |              |
|---|--------------|--------------|--------------|
| C | -2.111258000 | 1.288378000  | 3.205182000  |
| C | -3.271102000 | 0.438450000  | 2.953043000  |
| C | -4.238317000 | 0.875042000  | 2.023115000  |
| C | -0.895354000 | 0.676937000  | 3.579732000  |
| C | -0.803893000 | -0.743630000 | 3.805120000  |
| C | -1.899348000 | -1.545992000 | 3.565479000  |
| C | -3.127209000 | -0.958238000 | 3.093242000  |
| C | 0.511284000  | -1.186197000 | 3.420300000  |
| C | 1.217060000  | -0.029963000 | 2.935940000  |
| C | 0.349239000  | 1.116902000  | 3.043210000  |
| C | 2.065917000  | -0.146641000 | 1.855072000  |
| C | 2.255651000  | -1.420559000 | 1.213490000  |
| C | 1.572984000  | -2.535122000 | 1.671132000  |
| C | 0.679389000  | -2.415417000 | 2.798210000  |
| C | 2.080231000  | 0.882217000  | 0.844101000  |
| C | 2.261767000  | 0.252406000  | -0.419415000 |
| C | 0.979335000  | -3.455082000 | 0.725645000  |
| C | 1.093213000  | -3.199787000 | -0.632855000 |
| C | 1.806310000  | -2.040305000 | -1.104800000 |
| C | 1.111138000  | -1.521602000 | -2.255624000 |
| C | 1.083003000  | -0.141454000 | -2.550102000 |
| C | 1.681814000  | 0.781828000  | -1.589365000 |
| C | 0.411947000  | 2.181029000  | 2.118471000  |
| C | 1.312550000  | 2.060219000  | 0.976042000  |
| C | 0.977120000  | 2.720561000  | -0.223801000 |
| C | 1.158274000  | 2.088741000  | -1.489538000 |
| C | -0.282110000 | -3.894695000 | 1.266696000  |
| C | -0.467280000 | -3.255238000 | 2.548575000  |
| C | -1.730193000 | -2.827496000 | 2.930564000  |
| C | -0.761262000 | 2.951167000  | 1.971720000  |
| C | -3.715044000 | -1.860069000 | 2.158850000  |
| C | -2.854177000 | -3.010634000 | 2.049280000  |
| C | -2.678418000 | -3.619530000 | 0.824877000  |
| C | -1.371925000 | -4.077165000 | 0.425863000  |
| C | -1.033386000 | 3.687148000  | 0.762971000  |
| C | -0.180177000 | 3.574603000  | -0.314832000 |
| C | -0.042902000 | -3.381036000 | -1.499359000 |
| C | -1.247722000 | -3.810978000 | -0.981320000 |
| C | 0.000992000  | 0.309957000  | -3.332233000 |
| C | -0.453717000 | 1.676411000  | -3.272051000 |
| C | 0.115257000  | 2.550866000  | -2.369878000 |
| C | -0.712369000 | 3.484001000  | -1.649825000 |
| C | -2.084144000 | 3.502376000  | -1.855798000 |
| C | -2.679061000 | 2.588243000  | -2.801478000 |

|   |              |              |              |
|---|--------------|--------------|--------------|
| C | -1.875880000 | 1.697323000  | -3.497355000 |
| C | -4.826461000 | -0.026923000 | 1.088657000  |
| C | -4.463272000 | -1.390220000 | 1.058681000  |
| C | -4.277912000 | -2.035631000 | -0.237518000 |
| C | -3.359127000 | -3.102410000 | -0.334953000 |
| C | -2.476285000 | -3.218212000 | -1.447809000 |
| C | -5.105668000 | 0.705040000  | -0.120543000 |
| C | -4.469607000 | -1.268831000 | -1.406076000 |
| C | -3.586803000 | -1.385468000 | -2.520031000 |
| C | -2.489242000 | -2.272230000 | -2.495006000 |
| C | -1.214344000 | -1.821215000 | -3.045024000 |
| C | -0.021929000 | -2.350196000 | -2.503420000 |
| C | -4.928884000 | 0.095180000  | -1.344998000 |
| C | -3.498259000 | -0.095417000 | -3.154819000 |
| C | -4.339522000 | 0.826940000  | -2.436500000 |
| C | -3.940921000 | 2.143172000  | -2.258878000 |
| C | -1.133135000 | -0.519790000 | -3.580799000 |
| C | -2.292869000 | 0.329831000  | -3.672337000 |
| N | 5.004971000  | -1.291033000 | -0.476840000 |
| C | 5.438563000  | -2.469456000 | 0.235745000  |
| C | 6.848953000  | -2.918232000 | -0.132918000 |
| C | 6.973626000  | -3.083395000 | -1.641682000 |
| C | 6.538903000  | -1.812714000 | -2.359511000 |
| C | 5.141539000  | -1.399592000 | -1.908632000 |
| H | 7.092822000  | -3.852388000 | 0.381352000  |
| H | 5.357687000  | -2.276890000 | 1.308309000  |
| H | 7.564521000  | -2.164048000 | 0.213494000  |
| H | 4.734725000  | -3.282536000 | 0.007586000  |
| H | 7.996460000  | -3.351695000 | -1.917667000 |
| H | 6.334210000  | -3.913858000 | -1.964961000 |
| H | 7.240785000  | -1.003447000 | -2.128455000 |
| H | 4.415748000  | -2.146098000 | -2.263553000 |
| H | 6.557137000  | -1.953849000 | -3.444069000 |
| H | 4.854777000  | -0.445811000 | -2.359068000 |
| H | 5.416777000  | -0.433881000 | -0.108954000 |
| N | 5.490767000  | 1.513396000  | 0.623226000  |
| C | 5.249758000  | 2.362788000  | -0.536297000 |
| C | 4.840041000  | 3.784487000  | -0.176734000 |
| C | 5.856306000  | 4.411547000  | 0.767962000  |
| C | 6.085170000  | 3.517907000  | 1.979852000  |
| C | 6.451394000  | 2.104926000  | 1.543450000  |
| H | 4.489285000  | 1.887154000  | -1.159444000 |
| H | 6.174741000  | 2.386151000  | -1.124796000 |
| H | 7.424798000  | 2.120240000  | 1.039195000  |

|   |             |             |              |
|---|-------------|-------------|--------------|
| H | 6.554911000 | 1.444476000 | 2.407553000  |
| H | 6.869641000 | 3.927682000 | 2.622363000  |
| H | 5.170189000 | 3.478272000 | 2.582642000  |
| H | 6.806323000 | 4.545390000 | 0.236695000  |
| H | 5.530599000 | 5.406933000 | 1.079353000  |
| H | 3.856193000 | 3.758713000 | 0.305193000  |
| H | 4.730072000 | 4.383831000 | -1.084804000 |
| H | 4.610422000 | 1.372609000 | 1.107724000  |

### C<sub>70</sub>...pip C vdW

Subsystem A:1-70, subsystem B:71-87

87

|   |              |              |              |
|---|--------------|--------------|--------------|
| C | 3.275069926  | -2.621396051 | -0.021473890 |
| C | 2.547316086  | -3.063946326 | 1.139833018  |
| C | 3.987934230  | -1.432270362 | 0.013375488  |
| C | 2.563291810  | -2.308854706 | 2.293675932  |
| C | 1.352249407  | -2.141164142 | 3.056011533  |
| C | 0.159894254  | -2.806725347 | 2.702078900  |
| C | -1.041336006 | -2.201466845 | 3.130115040  |
| C | 3.160473999  | -0.854725019 | -2.217761770 |
| C | 2.416066187  | -2.086995184 | -2.244274440 |
| C | 3.929196140  | -0.528166916 | -1.110263447 |
| C | 2.471951180  | -2.950590880 | -1.170538383 |
| C | 1.272546219  | -3.608813322 | -0.718683000 |
| C | 0.048440548  | -3.464303088 | -1.405171279 |
| C | -1.121388629 | -3.670799684 | -0.643369863 |
| C | 0.142352527  | -3.605263786 | 1.480222476  |
| C | 1.318954827  | -3.678414573 | 0.704669300  |
| C | -1.075069799 | -3.740366458 | 0.779473474  |
| C | 3.122984870  | 1.781454683  | -1.214165538 |
| C | 2.320485933  | 1.433949010  | -2.358238017 |
| C | 3.910062952  | 0.820758368  | -0.596894200 |
| C | 2.338887857  | 0.145310021  | -2.848880753 |
| C | 1.110762608  | -0.473891001 | -3.278399579 |
| C | -0.107306452 | 0.237999287  | -3.296970021 |
| C | -1.283188712 | -0.536393913 | -3.203275120 |
| C | -0.010998468 | -2.549952416 | -2.541698233 |
| C | 1.158295238  | -1.849183505 | -2.905841599 |
| C | -1.235688491 | -1.911382131 | -2.830762341 |
| C | 3.214649149  | 1.643911400  | 1.602042607  |
| C | 2.392713626  | 2.633829576  | 0.954737307  |
| C | 3.957148077  | 0.750438295  | 0.844331516  |



|   |              |              |              |
|---|--------------|--------------|--------------|
| C | 2.348164278  | 2.701233519  | -0.421944930 |
| C | 1.090609609  | 2.932186103  | -1.086204071 |
| C | -0.092226585 | 3.184734034  | -0.359394914 |
| C | -1.303511222 | 2.869502663  | -1.011258127 |
| C | -0.126593617 | 1.602246125  | -2.777662101 |
| C | 1.073570245  | 2.151539208  | -2.279116909 |
| C | -1.320405833 | 2.089023989  | -2.203800123 |
| C | 3.308465274  | -1.077114097 | 2.339077451  |
| C | 2.532693275  | -0.145953886 | 3.116750212  |
| C | 4.005125814  | -0.641948127 | 1.221509371  |
| C | 2.487041100  | 1.184231159  | 2.756581291  |
| C | 1.238645118  | 1.901334681  | 2.827875323  |
| C | 0.072306327  | 1.301328214  | 3.346174916  |
| C | -1.153819673 | 1.838084383  | 2.902139832  |
| C | -0.044627010 | 3.113900867  | 1.097851133  |
| C | 1.181707441  | 2.795708651  | 1.718480551  |
| C | -1.211685332 | 2.731094005  | 1.793143026  |
| C | 0.120953805  | -0.105441536 | 3.728108110  |
| C | 1.332177512  | -0.807933905 | 3.562207278  |
| C | -1.060613207 | -0.870122625 | 3.637729457  |
| C | -3.185601917 | 1.476310078  | 1.802503112  |
| C | -2.364386225 | 1.057457982  | 2.909060292  |
| C | -2.318698641 | -0.271897299 | 3.270242059  |
| C | -3.927288386 | 0.544977098  | 1.091030216  |
| C | -3.277839962 | 1.614665695  | -1.014049664 |
| C | -2.503843958 | 2.574537148  | -0.270025819 |
| C | -2.458760599 | 2.506798787  | 1.106258483  |
| C | -3.973790365 | 0.615311365  | -0.350298576 |
| C | -3.240267876 | -1.021524968 | -2.017372330 |
| C | -2.512839479 | 0.018812102  | -2.696935081 |
| C | -2.530978380 | 1.307375779  | -2.206254030 |
| C | -3.954608203 | -0.733618555 | -0.863608767 |
| C | -3.125582891 | -2.788099883 | 0.178836709  |
| C | -2.379452341 | -3.076675174 | -1.018499604 |
| C | -2.435757833 | -2.213316123 | -2.092245553 |
| C | -3.895887031 | -1.637628820 | 0.260120628  |
| C | -3.091634340 | -1.243055318 | 2.539388925  |
| C | -2.287846423 | -2.434627720 | 2.445078120  |
| C | -2.304543781 | -3.189771285 | 1.291741451  |
| C | -3.879072901 | -0.847368321 | 1.468341260  |
| N | -1.401021883 | 1.418115336  | 6.238146310  |
| C | -0.082835840 | 1.595683632  | 6.821522535  |
| C | -2.138662096 | 2.666201711  | 6.154617735  |
| C | -0.093021037 | 2.308769698  | 8.168455938  |

|   |              |             |             |
|---|--------------|-------------|-------------|
| C | -0.840166884 | 3.631961179 | 8.064249376 |
| C | -2.229038472 | 3.420908762 | 7.475757435 |
| H | 0.514086817  | 2.180743595 | 6.110587531 |
| H | 0.397849988  | 0.617376540 | 6.899256421 |
| H | 0.931360512  | 2.468454949 | 8.517166354 |
| H | -0.584556934 | 1.668043073 | 8.910046185 |
| H | -3.133337753 | 2.455955417 | 5.754044751 |
| H | -1.631810004 | 3.297322193 | 5.413873003 |
| H | -2.840329021 | 2.842225717 | 8.178307465 |
| H | -2.737084658 | 4.378263859 | 7.328082163 |
| H | -0.275794578 | 4.310586568 | 7.413486578 |
| H | -0.903862833 | 4.117892721 | 9.040925238 |
| H | -1.927672202 | 0.743674075 | 6.779141256 |

### **C<sub>70</sub>-pip<sub>2</sub> C DB**

Interaction energy between piperidines and C<sub>70</sub>: subsystem A:1-70, subsystem B:71-104

Strength of H-bond: subsystem A:1-87, subsystem B:88-104  
104

|   |              |              |              |
|---|--------------|--------------|--------------|
| C | 2.451499000  | -0.213228000 | -1.000433000 |
| C | 1.497831000  | -0.395585000 | -2.204711000 |
| C | 0.858805000  | -1.627013000 | -2.417927000 |
| C | 0.982989000  | -2.748465000 | -1.509863000 |
| C | 1.606967000  | -2.532932000 | -0.293965000 |
| C | 2.214927000  | -1.276403000 | 0.031936000  |
| C | 0.892176000  | 0.722194000  | -2.799950000 |
| C | 1.051587000  | 2.069767000  | -2.293811000 |
| C | 1.674635000  | 2.233232000  | -1.069271000 |
| C | 2.247807000  | 1.127910000  | -0.359331000 |
| C | 1.956137000  | 1.324263000  | 1.008554000  |
| C | 1.716954000  | 0.273589000  | 1.928538000  |
| C | 1.923656000  | -1.021046000 | 1.390335000  |
| C | -0.387747000 | 0.641969000  | -3.424498000 |
| C | -1.122538000 | -0.559099000 | -3.439762000 |
| C | -0.421236000 | -1.713305000 | -3.041390000 |
| C | -1.102980000 | -2.864763000 | -2.515919000 |
| C | -0.236406000 | -3.508328000 | -1.561072000 |
| C | -0.779406000 | -4.078319000 | -0.415911000 |
| C | -0.119061000 | -3.870502000 | 0.846741000  |
| C | 1.047673000  | -3.121414000 | 0.901703000  |
| C | 1.241718000  | -2.167795000 | 1.949429000  |
| C | 0.686836000  | 0.452358000  | 2.937954000  |
| C | -0.033747000 | -0.675478000 | 3.395660000  |

|   |              |              |              |
|---|--------------|--------------|--------------|
| C | 0.282654000  | -1.997105000 | 2.925719000  |
| C | -0.926633000 | -2.777676000 | 2.884177000  |
| C | -1.129141000 | -3.692857000 | 1.861633000  |
| C | -2.204022000 | -4.013220000 | -0.186416000 |
| C | -2.420880000 | -3.780637000 | 1.222375000  |
| C | -3.449312000 | -2.946386000 | 1.634376000  |
| C | -3.229596000 | -1.991470000 | 2.691233000  |
| C | -1.996848000 | -1.909663000 | 3.302860000  |
| C | -1.439662000 | -0.618004000 | 3.620921000  |
| C | -0.000124000 | 1.686655000  | 3.011494000  |
| C | -1.406102000 | 1.742605000  | 3.237066000  |
| C | -2.171685000 | 0.570478000  | 3.413687000  |
| C | -3.475605000 | 0.483427000  | 2.764257000  |
| C | -3.955583000 | -0.786579000 | 2.378367000  |
| C | -4.610835000 | -0.980546000 | 1.127419000  |
| C | -4.298046000 | -2.307801000 | 0.662318000  |
| C | -4.090672000 | -2.530367000 | -0.683353000 |
| C | -3.031942000 | -3.404613000 | -1.117474000 |
| C | 0.350608000  | 2.781886000  | 2.148434000  |
| C | 1.309604000  | 2.607787000  | 1.172617000  |
| C | -2.464789000 | -2.816085000 | -2.304104000 |
| C | 1.137636000  | 3.185749000  | -0.124121000 |
| C | -1.928618000 | 2.881958000  | 2.523684000  |
| C | -0.836627000 | 3.542521000  | 1.856355000  |
| C | -1.018236000 | 4.091824000  | 0.595623000  |
| C | -0.008231000 | 3.910762000  | -0.418832000 |
| C | -0.668265000 | 3.726080000  | -1.685306000 |
| C | -0.146527000 | 2.807723000  | -2.588465000 |
| C | -3.921718000 | 1.578520000  | 1.993562000  |
| C | -4.577060000 | 1.384286000  | 0.742751000  |
| C | -4.810765000 | 0.090175000  | 0.229420000  |
| C | -4.589988000 | -0.144410000 | -1.193371000 |
| C | -4.193450000 | -1.433128000 | -1.612327000 |
| C | -3.190947000 | -1.609191000 | -2.609699000 |
| C | -3.161257000 | 2.799829000  | 1.911875000  |
| C | -4.229821000 | 2.486645000  | -0.117479000 |
| C | -3.359223000 | 3.376473000  | 0.605951000  |
| C | -2.309964000 | 4.008501000  | -0.044443000 |
| C | -4.159716000 | 0.933664000  | -1.997235000 |
| C | -3.157200000 | 0.756759000  | -2.994361000 |
| C | -2.561532000 | -0.502605000 | -3.218143000 |
| C | -4.022385000 | 2.265454000  | -1.463331000 |
| C | -2.396519000 | 1.977685000  | -3.083613000 |
| C | -2.941753000 | 2.927363000  | -2.147270000 |

|   |              |              |              |
|---|--------------|--------------|--------------|
| C | -2.093050000 | 3.776466000  | -1.453352000 |
| C | -1.034934000 | 1.919020000  | -3.293920000 |
| N | 3.962902000  | -0.314641000 | -1.503022000 |
| C | 6.205825000  | -0.648291000 | -3.332367000 |
| C | 5.804990000  | 0.710971000  | -2.782688000 |
| C | 4.326292000  | 0.755892000  | -2.451585000 |
| C | 4.301380000  | -1.645242000 | -2.043844000 |
| C | 5.779235000  | -1.742525000 | -2.367409000 |
| H | 3.690410000  | -1.798910000 | -2.936626000 |
| H | 4.004940000  | -2.382997000 | -1.300119000 |
| H | 5.979024000  | -2.732970000 | -2.780969000 |
| H | 6.356975000  | -1.665897000 | -1.440278000 |
| H | 4.046957000  | 1.703589000  | -1.994322000 |
| H | 3.716332000  | 0.618310000  | -3.347617000 |
| H | 6.383289000  | 0.931318000  | -1.879181000 |
| H | 6.024521000  | 1.506080000  | -3.497897000 |
| H | 5.719027000  | -0.806934000 | -4.300617000 |
| H | 7.282273000  | -0.689486000 | -3.508910000 |
| H | 4.506561000  | -0.164311000 | -0.598399000 |
| N | 5.129165000  | 0.126857000  | 1.006094000  |
| C | 5.979762000  | -0.915594000 | 1.574673000  |
| C | 5.690963000  | 1.462921000  | 1.193484000  |
| C | 5.999857000  | 1.774570000  | 2.649256000  |
| C | 6.301162000  | -0.681832000 | 3.042868000  |
| C | 6.900232000  | 0.703012000  | 3.249251000  |
| H | 6.610547000  | 1.523387000  | 0.599418000  |
| H | 4.985850000  | 2.186761000  | 0.778963000  |
| H | 6.462052000  | 2.761743000  | 2.728719000  |
| H | 5.057503000  | 1.820261000  | 3.206431000  |
| H | 7.883618000  | 0.746260000  | 2.765941000  |
| H | 7.066858000  | 0.893157000  | 4.311697000  |
| H | 6.980472000  | -1.458428000 | 3.403569000  |
| H | 5.377256000  | -0.773718000 | 3.624685000  |
| H | 6.908901000  | -0.941026000 | 0.993083000  |
| H | 5.481362000  | -1.877390000 | 1.431947000  |
| H | 4.230713000  | 0.095070000  | 1.481594000  |

### C<sub>70</sub>...pip<sub>2</sub> C vdW

Interaction energy between piperidines and C<sub>70</sub>: subsystem A:1-70, subsystem B:71-104  
104

|   |              |             |             |
|---|--------------|-------------|-------------|
| C | -0.709543381 | 0.045839494 | 3.329868834 |
| C | -0.789751108 | 1.382268239 | 2.754563789 |

|   |              |              |              |
|---|--------------|--------------|--------------|
| C | 0.403908879  | 2.012581296  | 2.347095464  |
| C | 1.691654672  | 1.407732906  | 2.574569659  |
| C | 1.768423075  | 0.145375663  | 3.122447482  |
| C | 0.558480985  | -0.559908733 | 3.457117010  |
| C | -1.958298237 | 1.743777058  | 2.054199239  |
| C | -3.097087159 | 0.862598300  | 1.981467579  |
| C | -3.022464519 | -0.400233961 | 2.530471686  |
| C | -1.803534593 | -0.828602505 | 3.169598561  |
| C | -1.610335260 | -2.210171739 | 2.868303413  |
| C | -0.316661985 | -2.752755605 | 2.722017298  |
| C | 0.752147231  | -1.939178914 | 3.156714532  |
| C | -1.892173178 | 2.477987339  | 0.833532003  |
| C | -0.653879586 | 2.869344027  | 0.282345544  |
| C | 0.470906297  | 2.744617967  | 1.126296021  |
| C | 1.801204892  | 2.596590383  | 0.591321257  |
| C | 2.568955391  | 1.777133939  | 1.493717077  |
| C | 3.487254007  | 0.864613464  | 0.995842206  |
| C | 3.567362054  | -0.457320131 | 1.569897877  |
| C | 2.724479395  | -0.804956814 | 2.615201363  |
| C | 2.084196548  | -2.095496137 | 2.629103237  |
| C | -2.987587125 | 2.052733520  | -0.000357808 |
| C | -3.748771618 | 1.059200423  | 0.712724247  |
| C | -4.294838556 | -0.020514323 | 0.034644263  |
| C | -4.215855156 | -1.342292341 | 0.608726467  |
| C | -3.594147731 | -1.524301882 | 1.835401071  |
| C | -2.706647014 | -2.640677164 | 2.038566725  |
| C | -2.478106402 | -3.536866148 | 1.015135867  |
| C | -1.146173476 | -4.035994659 | 0.784899242  |
| C | -0.074695992 | -3.701867409 | 1.640180854  |
| C | 1.217601235  | -3.766598562 | 1.076529972  |
| C | 2.311812349  | -2.991767796 | 1.606414876  |
| C | -2.806414714 | 1.936966169  | -1.362370421 |
| C | -1.522545029 | 2.240991641  | -1.941144580 |
| C | -0.461755567 | 2.745912173  | -1.159389837 |
| C | 0.840366573  | 2.509236617  | -1.649099768 |
| C | 1.982417214  | 2.481078290  | -0.770386602 |
| C | 2.939800840  | 1.540704779  | -1.293230386 |
| C | 3.676629132  | 0.743325649  | -0.430446650 |
| C | 3.873302896  | -0.653313977 | -0.737443900 |
| C | 3.805176775  | -1.395537640 | 0.498673582  |
| C | 3.191520236  | -2.639347614 | 0.522196320  |
| C | -0.958391085 | -4.154606331 | -0.623584398 |
| C | 0.305202074  | -3.942539722 | -1.214288137 |
| C | 1.404730985  | -3.885344533 | -0.331224942 |

|   |              |              |              |
|---|--------------|--------------|--------------|
| C | 2.615343854  | -3.185186657 | -0.679356779 |
| C | 2.680368947  | -2.476198752 | -1.860142421 |
| C | 3.324117149  | -1.188548507 | -1.893349434 |
| C | 2.365017208  | 0.976887585  | -2.487099628 |
| C | 2.553243729  | -0.357180502 | -2.780763810 |
| C | 1.459048446  | -1.135503962 | -3.304047538 |
| C | 1.537454321  | -2.440852801 | -2.737242625 |
| C | 0.374385341  | -3.191947271 | -2.464521243 |
| C | -3.126982030 | -3.357588773 | -0.257976783 |
| C | -2.173607259 | -3.730017717 | -1.270953841 |
| C | -2.108265217 | -3.020835529 | -2.451799046 |
| C | -0.825353498 | -2.709814505 | -3.029273640 |
| C | -0.903737418 | -1.404082537 | -3.596262208 |
| C | 0.215411250  | -0.545057713 | -3.614021988 |
| C | 0.016477671  | 0.867464098  | -3.303524698 |
| C | 1.076174870  | 1.582892322  | -2.706307097 |
| C | -3.976353523 | -2.280331250 | -0.462299117 |
| C | -2.993445633 | -1.906964515 | -2.673778363 |
| C | -3.908227368 | -1.538169000 | -1.698464043 |
| C | -4.104919141 | -0.141582698 | -1.391617162 |
| C | -3.377666753 | 0.822318798  | -2.073537106 |
| C | -2.235641055 | -0.901719508 | -3.372520612 |
| C | -2.423262669 | 0.432562867  | -3.078900733 |
| C | -1.286542928 | 1.314343067  | -2.998711512 |
| N | -0.384530157 | -0.976568569 | 6.763589932  |
| C | -2.341715485 | -2.520431172 | 6.826487750  |
| C | -1.753698268 | -1.170088891 | 7.216262844  |
| C | 0.493821272  | -2.058622108 | 7.181173710  |
| C | -0.012445481 | -3.441570295 | 6.790239831  |
| C | -1.435303213 | -3.652910580 | 7.290335792  |
| H | -0.378582003 | -0.924926801 | 5.751612871  |
| H | -1.759206365 | -1.071602746 | 8.308279614  |
| H | -2.364959092 | -0.353545665 | 6.823815514  |
| H | -3.345494887 | -2.629112139 | 7.247036471  |
| H | -2.447467648 | -2.560182319 | 5.736202859  |
| H | -1.430108388 | -3.682497414 | 8.386590697  |
| H | -1.822265612 | -4.618019544 | 6.954253594  |
| H | 0.656196000  | -4.212068566 | 7.184581882  |
| H | 0.008240153  | -3.531501787 | 5.698159617  |
| H | 0.595430836  | -2.002162489 | 8.271373427  |
| H | 1.486425030  | -1.876468394 | 6.761979405  |
| N | 0.306169576  | 1.898010725  | 5.766972479  |
| C | -0.903982928 | 2.680483503  | 5.921117371  |
| C | -1.021294859 | 3.370805718  | 7.275343929  |

|   |              |             |             |
|---|--------------|-------------|-------------|
| C | 0.221481848  | 4.207094074 | 7.551409264 |
| C | 1.481202188  | 3.363605857 | 7.403990338 |
| C | 1.501226806  | 2.668048742 | 6.046616278 |
| H | 1.608568560  | 3.424404302 | 5.257448487 |
| H | 2.367494437  | 2.006698088 | 5.963051519 |
| H | 2.376611808  | 3.980271961 | 7.526994802 |
| H | 1.505396319  | 2.602903563 | 8.192657838 |
| H | -1.764011417 | 2.028186160 | 5.744436507 |
| H | -0.921346589 | 3.439693537 | 5.127813726 |
| H | -1.129402146 | 2.606934027 | 8.053914168 |
| H | -1.921503334 | 3.991893486 | 7.308102925 |
| H | 0.260280655  | 5.036357503 | 6.834460110 |
| H | 0.171808974  | 4.657453409 | 8.546082222 |
| H | 0.258601854  | 1.076172584 | 6.365493459 |
